# Supplementary material for: Electrophoretic deposition of Li4Ti5O12 nanoparticles with a novel additive for Li-ion microbatteries
Source: Royal Society of Chemistry journal article supplement (doi:10.1039/c5ra11039d), 2015-01-01
Supplement: c5ra11039d1.pdf [file c5ra11039d1.pdf]

## Supplementary Information

Electrophoretic deposition of  $\text{Li}_4\text{Ti}_5\text{O}_{12}$  nanoparticles with a novel additive for Li-ion  
microbatteries

N. A. Kyeremateng<sup>1,2</sup>, T. M. Dinh<sup>1,2</sup>, D. Pech<sup>1,2,\*</sup>

<sup>1</sup>LAAS-CNRS (UMR 8001), 7 avenue du Colonel Roche, F-31077 Toulouse (France).

<sup>2</sup>University of Toulouse, LAAS, F-31400 Toulouse (France).

\*E-mail: [dpech@laas.fr](mailto:dpech@laas.fr);

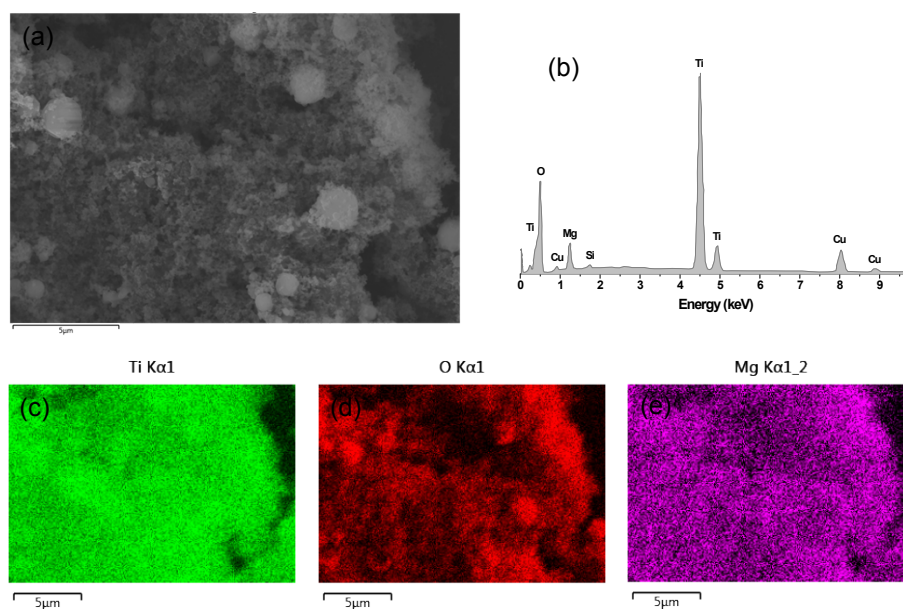

Fig. S1. SEM micrograph (a); EDS spectrum (b); and mapping micrographs for Ti (c) O (d) and Mg (e) obtained for the electrophoretically prepared  $\text{Li}_4\text{Ti}_5\text{O}_{12}$  thick film.

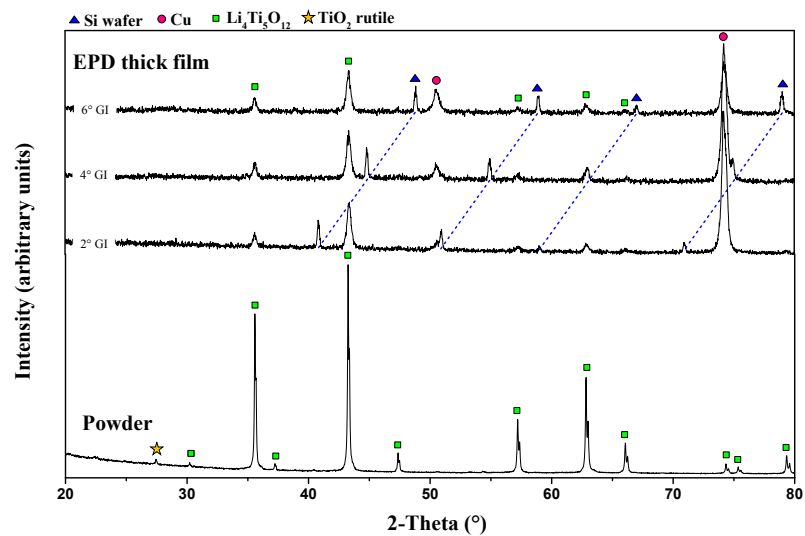

Fig. S2. X-ray diffractograms recorded for the as-received  $\text{Li}_4\text{Ti}_5\text{O}_{12}$  powder, and the electrophoretically prepared  $\text{Li}_4\text{Ti}_5\text{O}_{12}$  thick film at different grazing incidences (GI). The  $4^\circ$  peak shifts are attributed to the Si single crystal.
